# Supplementary material for: Multi-Omics Approach Reveals Prebiotic and Potential Antioxidant Effects of Essential Oils from the Mediterranean Diet on Cardiometabolic Disorder Using Humanized Gnotobiotic Mice
Source: MDPI journal article supplement (doi:10.3390/antiox12081643), 2023-08-20
Supplement: s1 [file antioxidants-2541348-supplementary.pdf › antioxidants-2541348-supplementary.pdf]

**Table S1.** Proximate composition and energy content of the diet used for mice.

| Crude Nutrient                  | (%)  | Additive                    | Per kg |
|---------------------------------|------|-----------------------------|--------|
| Crude Protein                   | 22.0 | Vitamin A [IU]              | 15,000 |
| Crude fat                       | 23.6 | Vitamin D <sub>3</sub> [IU] | 1,500  |
| Crude fiber                     | 5.7  | Vitamin E [mg]              | 150    |
| Crude ash                       | 5.4  | Vitamin C [mg]              | 30     |
| Starch                          | 6.8  |                             |        |
| Sugar                           | 21.1 | Copper [mg]                 | 12     |
| Energy: 19.3 MJ [or kcal] ME/kg |      |                             |        |

**Table S2.** Composition of essential oils derived from thyme and oregano using SPME-GC-MS.

| Essential oil derived from thyme            |            |              |          |                      |
|---------------------------------------------|------------|--------------|----------|----------------------|
| Compound Name                               | CAS#       | Match Factor | Area     | Relative abundance % |
| Hexanal                                     | 66-25-1    | 97.29        | 55245    | 0.055                |
| Cyclotrisiloxane, hexamethyl-               | 541-05-9   | 97.81        | 213814   | 0.213                |
| Heptanal                                    | 111-71-7   | 98.76        | 79477    | 0.079                |
| Benzaldehyde                                | 100-52-7   | 99.50        | 811026   | 0.808                |
| Hexanoic acid                               | 142-62-1   | 98.00        | 55096    | 0.055                |
| Octanal                                     | 124-13-0   | 99.00        | 281799   | 0.281                |
| Decane                                      | 124-18-5   | 98.40        | 255001   | 0.254                |
| Benzyl alcohol                              | 100-51-6   | 99.72        | 12395148 | 12.349               |
| o-Cymene                                    | 527-84-4   | 95.92        | 69140    | 0.069                |
| Eucalyptol                                  | 470-82-6   | 99.50        | 47898429 | 47.722               |
| 1-Octanol                                   | 111-87-5   | 97.40        | 40472    | 0.040                |
| Undecane, 4,7-dimethyl-                     | 17301-32-5 | 93.76        | 73999    | 0.074                |
| 1,6-Octadien-3-ol, 3,7-dimethyl- (Linalool) | 78-70-6    | 99.26        | 23519627 | 23.433               |
| Undecane, 4,7-dimethyl-                     | 17301-32-5 | 93.10        | 53544    | 0.053                |
| Octanoic acid                               | 124-07-2   | 97.58        | 382622   | 0.381                |
| (+)-2-Bornanone                             | 464-49-3   | 99.02        | 476465   | 0.475                |
| 1-Propanone, 1-phenyl-                      | 93-55-0    | 96.19        | 36672    | 0.037                |
| endo-Borneol                                | 507-70-0   | 97.87        | 208895   | 0.208                |
| Terpinen-4-ol                               | 562-74-3   | 98.05        | 1979418  | 1.972                |
| $\alpha$ -Terpineol                         | 98-55-5    | 98.06        | 3810973  | 3.797                |
| Linalyl acetate                             | 115-95-7   | 98.08        | 1681086  | 1.675                |
| 2-Decenal, (Z)-                             | 2497-25-8  | 93.36        | 186523   | 0.186                |
| Thymol                                      | 89-83-8    | 97.49        | 1734983  | 1.729                |

|                                                                                                      |            |       |        |       |
|------------------------------------------------------------------------------------------------------|------------|-------|--------|-------|
| Phenol. 2-methyl-5-(1-methylethyl)- (Carvacrol)                                                      | 499-75-2   | 98.72 | 958727 | 0.955 |
| Isobornyl acetate                                                                                    | 125-12-2   | 96.52 | 193313 | 0.193 |
| Glycerol 1.2-diacetate                                                                               | 102-62-5   | 94.09 | 88140  | 0.088 |
| 3-Cyclohexene-1-methanol. $\alpha$ . $\alpha$ .4-trimethyl-. acetate (1- $\alpha$ -Terpinyl acetate) | 80-26-2    | 96.80 | 768268 | 0.765 |
| 2.6-Octadien-1-ol. 3.7-dimethyl-. acetate. (Z)- (Nerol acetate)                                      | 141-12-8   | 96.61 | 339273 | 0.338 |
| 1-Nonadecene                                                                                         | 18435-45-5 | 96.05 | 509024 | 0.507 |
| Caryophyllene                                                                                        | 87-44-5    | 98.97 | 830160 | 0.827 |
| Caryophyllene oxide                                                                                  | 1139-30-6  | 94.05 | 383885 | 0.382 |

#### Essential oil derived from oregano

| Compound Name                    | CAS#       | Match Factor | Area    | Relative abundance % |
|----------------------------------|------------|--------------|---------|----------------------|
| Propylene Glycol                 | 57-55-6    | 97.80        | 160791  | 0.235                |
| Hexanal                          | 66-25-1    | 96.49        | 18884   | 0.028                |
| Heptanal                         | 111-71-7   | 93.99        | 36090   | 0.053                |
| Camphene                         | 79-92-5    | 98.27        | 157767  | 0.231                |
| 1-Octen-3-ol                     | 3391-86-4  | 96.84        | 105410  | 0.154                |
| Octanal                          | 124-13-0   | 98.34        | 138950  | 0.203                |
| Decane                           | 124-18-5   | 98.72        | 329778  | 0.482                |
| Benzyl alcohol                   | 100-51-6   | 98.76        | 710454  | 1.038                |
| o-Cymene                         | 527-84-4   | 98.80        | 1349311 | 1.972                |
| Nonane. 2.6-dimethyl-            | 17302-28-2 | 94.77        | 16966   | 0.025                |
| Eucalyptol                       | 470-82-6   | 99.45        | 2522700 | 3.686                |
| $\gamma$ -Terpinene              | 99-85-4    | 96.45        | 151752  | 0.222                |
| 1.6-Octadien-3-ol. 3.7-dimethyl- | 78-70-6    | 97.09        | 1206835 | 1.763                |
| Octane. 5-ethyl-2-methyl-        | 62016-18-6 | 93.56        | 52184   | 0.076                |
| <b>Hexane. 3.3-dimethyl-</b>     | 563-16-6   | 94.34        | 19494   | 0.028                |

|                                                        |           |       |          |        |
|--------------------------------------------------------|-----------|-------|----------|--------|
| <b>endo-Borneol</b>                                    | 507-70-0  | 97.09 | 95727    | 0.140  |
| <b>Terpinen-4-ol</b>                                   | 562-74-3  | 93.25 | 69744    | 0.102  |
| <b>Thymol</b>                                          | 89-83-8   | 98.82 | 26238606 | 38.338 |
| <b>Phenol. 2-methyl-5-(1-methylethyl)- (Carvacrol)</b> | 499-75-2  | 98.86 | 14155626 | 20.683 |
| <b>Isobornyl acetate</b>                               | 125-12-2  | 99.16 | 15799968 | 23.086 |
| <b>Glycerol 1.2-diacetate</b>                          | 102-62-5  | 97.76 | 850967   | 1.243  |
| <b>1-Octadecene</b>                                    | 112-88-9  | 97.91 | 670402   | 0.980  |
| <b>Caryophyllene</b>                                   | 87-44-5   | 99.63 | 3063608  | 4.476  |
| <b>Phenol. 2.4-bis(1.1-dimethylethyl)-</b>             | 96-76-4   | 93.25 | 223094   | 0.326  |
| Caryophyllene oxide                                    | 1139-30-6 | 94.57 | 294348   | 0.430  |

**Table S3.** Abundance of significantly proteins in heart samples of the thyme and oregano groups.

| Protein Name                                                  | Gene Name | p-Value  | Fold-Change | Biological Function                                | Accession Number | Treatment / dose (mg/ml) |
|---------------------------------------------------------------|-----------|----------|-------------|----------------------------------------------------|------------------|--------------------------|
| fN(G),N(G)-dimethylarginine dimethylaminohydrolase 1          | DDAH1     | 0.006    | -2.04       | Metabolism nitric oxide                            | Q9CWS0           | Thyme/10                 |
| Stomatin-like protein 2, mitochondrial                        | STOML2    | 0.01     | -1.84       | Biogenesis and activity of mitochondria regulation | Q99JB2           | Thyme/10                 |
| DNA-(apurinic or apyrimidinic site) lyase                     | APEX1     | 0.02     | -1.59       | Redox regulation of transcriptional factors        | P28352           | Thyme/10                 |
| Hydroxyacylglutathione hydrolase, mitochondrial               | HAGH      | 0.003    | -1.38       | Detoxification of methylglyoxal                    | Q99KB8           | Thyme/10                 |
| Protein MEMO1                                                 | MEMO1     | 0.01     | -1.07       | NADH oxidase-induced redox signaling               | Q91VH6           | Thyme/10                 |
| Acidic leucine-rich nuclear phosphoprotein 32 family member A | ANP32A    | < 0.0001 | -1.19       | Oxidative stress regulation via ATM                | O35381           | Thyme/10                 |
| Translation factor GUF1, mitochondrial                        | GUF1      | 0.01     | -1.01       | Mitochondrial protein synthesis                    | Q8C3X4           | Thyme/10                 |
| Aldose reductase-related protein 2                            | AKR1B8    | 0.03     | -0.98       | Carbonyl metabolism                                | P45377           | Thyme/10                 |
| Alpha-methylacyl-CoA racemase                                 | AMACR     | 0.04     | -0.91       | Peroxisomal lipid metabolism                       | O09174           | Thyme/10                 |
| Monoglyceride lipase                                          | MGLL      | 0.009    | -0.84       | Lipid metabolism                                   | O35678           | Thyme/10                 |
| 28S ribosomal protein S36, mitochondrial                      | MRPS36    | < 0.0001 | -0.83       | Tricarboxylic acid cycle                           | Q9CQX8           | Thyme/10                 |
| Ribosome-recycling factor, mitochondrial                      | MRRF      | 0.02     | -0.68       | Mitochondrial translational machinery              | Q9D6S7           | Thyme/10                 |
| Cytochrome c1, heme protein, mitochondrial                    | CYC1      | 0.006    | -0.66       | Mitochondrial respiratory chain                    | Q9D0M3           | Thyme/10                 |
| Dihydropteridine reductase                                    | QDPR      | 0.02     | -0.66       | Regeneration of tetrahydrobiopterin (BH4)          | Q8BVI4           | Thyme/10                 |

|                                                                   |          |          |       |                                                         |        |          |
|-------------------------------------------------------------------|----------|----------|-------|---------------------------------------------------------|--------|----------|
| Phosphatidylglycerophosphatase and protein-tyrosine phosphatase 1 | PTPMT1   | 0.008    | -0.65 | Biogenesis and activity of mitochondria regulation      | Q66GT5 | Thyme/10 |
| Protein SCO1 homolog, mitochondrial                               | SCO1     | 0.03     | -0.57 | Maturation of cytochrome c oxidase                      | Q5SUC9 | Thyme/10 |
| LYR motif-containing protein 4                                    | LYRM4    | 0.006    | -0.55 | NSF1 stability and activity regulation                  | Q8K215 | Thyme/10 |
| Prosaposin                                                        | PSAP     | 0.01     | -0.54 | Lipid metabolism                                        | Q61207 | Thyme/10 |
| Triosephosphate isomerase                                         | TPI1     | 0.003    | -0.5  | Production of methylglyoxal                             | P17751 | Thyme/10 |
| Heat shock protein 75 kDa, mitochondrial                          | TRAP1    | 0.03     | 0.82  | Maintaining mitochondrial function and polarization     | Q9CQN1 | Thyme/10 |
| ADP/ATP translocase 4                                             | SLC25A31 | 0.04     | 0.81  | Mitochondrial ADP:ATP antiporter and proton transporter | Q3V132 | Thyme/10 |
| Transforming protein RhoA                                         | RHOA     | 0.04     | 0.69  | Oxidative stress response                               | Q9QUI0 | Thyme/10 |
| Chloride intracellular channel protein 1                          | CLIC1    | 0.02     | 0.69  | ROS generation by the NADPH oxidase                     | Q9Z1Q5 | Thyme/10 |
| Heterogeneous nuclear ribonucleoprotein U                         | HNRNPU   | 0.008    | 0.51  | NEIL1-mediated oxidative repair                         | Q8VEK3 | Thyme/10 |
| Isoform 2 of Aspartyl/asparaginyl beta-hydroxylase                | ASPH     | < 0.0001 | -0.99 | Cardiac contraction                                     | Q8BSY0 | Thyme/10 |
| Tropomyosin beta chain                                            | TPM2     | 0.01     | -0.79 | Cardiac contraction                                     | P58774 | Thyme/10 |
| Tropomyosin alpha-1 chain                                         | TPM1     | 0.006    | -0.52 | Cardiac contraction                                     | P58771 | Thyme/10 |
| Transforming protein RhoA                                         | RHOA     | 0.04     | 0.69  | Cardiac contraction                                     | Q9QUI0 | Thyme/10 |
| Nuclease-sensitive element-binding protein 1                      | YBX1     | 0.03     | -1.51 | NEIL2-mediated repair under oxidative stress            | P62960 | Thyme/20 |
| Acidic leucine-rich nuclear phosphoprotein 32 family member A     | ANP32A   | < 0.0001 | -1.13 | Oxidative stress regulation via ATM                     | O35381 | Thyme/20 |

|                                                                            |          |          |       |                                                         |        |          |
|----------------------------------------------------------------------------|----------|----------|-------|---------------------------------------------------------|--------|----------|
| Protein MEMO1                                                              | MEMO1    | 0.02     | -1.07 | NADH oxidase-induced redox signaling                    | Q91VH6 | Thyme/20 |
| Hydroxyacylglutathione hydrolase, mitochondrial                            | HAGH     | 0.02     | -0.96 | Detoxification of methylglyoxal                         | Q99KB8 | Thyme/20 |
| Fructose-2,6-bisphosphatase TIGAR                                          | TIGAR    | 0.03     | -0.83 | ROS levels regulation                                   | Q8BZA9 | Thyme/20 |
| 28S ribosomal protein S36, mitochondrial                                   | MRPS36   | < 0.0001 | -0.81 | Tricarboxylic acid cycle                                | Q9CQX8 | Thyme/20 |
| Isoform 2 of Mitochondrial import inner membrane translocase subunit Tim21 | TIMM21   | 0.02     | -0.81 | Mitochondrial respiratory chain assembly                | Q8CCM6 | Thyme/20 |
| Ribosome-recycling factor, mitochondrial                                   | MRRF     | 0.04     | -0.63 | Mitochondrial translational machinery                   | Q9D6S7 | Thyme/20 |
| Heterogeneous nuclear ribonucleoprotein D0                                 | HNRNPD   | 0.005    | -0.54 | Elimination of oxidized RNA                             | Q60668 | Thyme/20 |
| Cytochrome c1, heme protein, mitochondrial                                 | CYC1     | 0.02     | -0.54 | Mitochondrial respiratory chain                         | Q9D0M3 | Thyme/20 |
| NADH dehydrogenase [ubiquinone] 1 beta subcomplex subunit 6                | NDUFB6   | 0.02     | -0.54 | Mitochondrial respiratory chain                         | Q3UIU2 | Thyme/20 |
| Mitochondrial-processing peptidase subunit beta                            | PMPCB    | < 0.0001 | -0,52 | Peroxisomal lipid metabolism                            | Q9CXT8 | Thyme/20 |
| Cytochrome c oxidase assembly factor 7                                     | COA7     | 0.04     | 1.02  | Mitochondrial respiratory chain assembly                | Q921H9 | Thyme/20 |
| ADP/ATP translocase 4                                                      | SLC25A31 | 0.02     | 0.97  | Mitochondrial ADP:ATP antiporter and proton transporter | Q3V132 | Thyme/20 |
| Heat shock protein 75 kDa, mitochondrial                                   | TRAP1    | 0.03     | 0.77  | Maintaining mitochondrial function and polarization     | Q9CQN1 | Thyme/20 |
| Chloride intracellular channel protein 1                                   | CLIC1    | 0.007    | 0.77  | ROS generation by the NAPDH oxidase                     | Q9Z1Q5 | Thyme/20 |
| Clusterin                                                                  | CLU      | 0.02     | 0.66  | Oxidative stress-induced cell death regulation          | Q06890 | Thyme/20 |

|                                                                            |         |          |       |                                                               |        |            |
|----------------------------------------------------------------------------|---------|----------|-------|---------------------------------------------------------------|--------|------------|
| Ras-related protein Rab-5C                                                 | RAB5C   | 0.02     | 0.55  | Oxidative stress response                                     | P35278 | Thyme/20   |
| Isoform 2 of Aspartyl/asparaginyl beta-hydroxylase                         | ASPH    | < 0.0001 | -1.11 | Cardiac contraction                                           | Q8BSY0 | Thyme/20   |
| Tropomyosin beta chain                                                     | TPM2    | 0.006    | -0.87 | Cardiac contraction                                           | P58774 | Thyme/20   |
| Ras GTPase-activating-like protein IQGAP1                                  | IQGAP1  | 0.01     | -1.56 | ROS regulation through Nrf2                                   | Q9JKF1 | Oregano/10 |
| Small ubiquitin-related modifier 3                                         | SUMO3   | 0.003    | -1.49 | SUMOylation, process regulated by cellular oxidative stress   | Q9Z172 | Oregano/10 |
| Acyl carrier protein, mitochondrial                                        | NDUFAB1 | 0.001    | -1.23 | Mitochondrial respiratory chain                               | Q9CR21 | Oregano/10 |
| NEDD8-activating enzyme E1 regulatory subunit                              | NAE1    | 0.02     | -1.11 | Promotes oxidative metabolism in heart                        | Q8VBW6 | Oregano/10 |
| Ribosome-recycling factor, mitochondrial                                   | MRRF    | 0.02     | -0.97 | Mitochondrial translational machinery                         | Q9D6S7 | Oregano/10 |
| Delta-1-pyrroline-5-carboxylate dehydrogenase, mitochondrial               | ALDH4A1 | 0.03     | -0.89 | Carbonyl metabolism                                           | Q8CHT0 | Oregano/10 |
| Mitogen-activated protein kinase 3                                         | MAPK3   | 0.002    | -0.82 | ROS regulation through Nrf2                                   | Q63844 | Oregano/10 |
| MICOS complex subunit MIC19                                                | CHCHD3  | 0.02     | -0.72 | Oxidative stress response                                     | Q9CRB9 | Oregano/10 |
| Isoform 2 of Mitochondrial import inner membrane translocase subunit Tim21 | TIMM21  | 0.02     | -0.69 | Mitochondrial respiratory chain assembly                      | Q8CCM6 | Oregano/10 |
| Glutathione S-transferase Mu 5                                             | GSTM5   | 0.01     | -0.67 | Glutathione conjugation                                       | P48774 | Oregano/10 |
| CDGSH iron-sulfur domain-containing protein 2                              | CISD2   | 0.01     | -0.65 | Iron metabolism                                               | Q9CQB5 | Oregano/10 |
| Alcohol dehydrogenase [NADP(+)]                                            | AKR1A1  | 0.03     | -0.61 | Carbonyl metabolism                                           | Q9JII6 | Oregano/10 |
| Cytochrome b5 type B                                                       | CYB5B   | 0.01     | -0.53 | Nitric oxide biosynthesis and electron carrier for oxygenases | Q9CQX2 | Oregano/10 |



|                                                              |          |          |       |                                                                      |        |            |
|--------------------------------------------------------------|----------|----------|-------|----------------------------------------------------------------------|--------|------------|
| Elongation factor Tu, mitochondrial                          | TUFM     | 0.03     | -0.53 | Protein translation in mitochondria                                  | Q8BFR5 | Oregano/10 |
| Heterogeneous nuclear ribonucleoprotein D0                   | HNRNPD   | < 0.0001 | -0.53 | Elimination of oxidized RNA                                          | Q60668 | Oregano/10 |
| Mitochondrial import receptor subunit TOM22 homolog          | TOMM22   | 0.006    | -0.52 | Electron carrier for oxygenases                                      | Q9CPQ3 | Oregano/10 |
| Perilipin-4                                                  | PLIN4    | 0.01     | 1.3   | Lipid metabolism                                                     | O88492 | Oregano/10 |
| Mitochondrial coenzyme A transporter SLC25A42                | SLC25A42 | 0.01     | 0.91  | Mitochondrial carrier mediating the transport of coenzyme A          | Q8R0Y8 | Oregano/10 |
| Myoglobin                                                    | MB       | 0.01     | 0.68  | Oxygen reserve and nitric oxide regulation                           | P04247 | Oregano/10 |
| Acyl-CoA synthetase family member 2, mitochondrial           | ACSF2    | 0.02     | 0.64  | Lipid metabolism and fatty acid oxidation                            | Q8VCW8 | Oregano/10 |
| Clusterin                                                    | CLU      | 0.03     | 0.64  | Oxidative stress-induced cell death regulation                       | Q06890 | Oregano/10 |
| PGC-1 and ERR-induced regulator in muscle protein 1          | PERM1    | 0.04     | 0.62  | Mitochondrial biogenesis and oxidative capacity                      | Q149B8 | Oregano/10 |
| NADH dehydrogenase [ubiquinone] 1 alpha subcomplex subunit 5 | NDUFA5   | 0.03     | 0.6   | Mitochondrial respiratory chain                                      | Q9CPP6 | Oregano/10 |
| Trans-1,2-dihydrobenzene-1,2-diol dehydrogenase              | DHDH     | 0.002    | 0.53  | NADP1-linked oxidation of transdihydrodiols of aromatic hydrocarbons | Q9DBB8 | Oregano/10 |
| Peroxiredoxin-6                                              | PRDX6    | 0.04     | 0.5   | Redox regulation                                                     | O08709 | Oregano/10 |
| Isoform 5 of LIM domain-binding protein 3                    | LDB3     | < 0.0001 | -1.81 | Cardiac contraction                                                  | Q9JKS4 | Oregano/10 |
| Ras GTPase-activating-like protein IQGAP1                    | IQGAP1   | 0.01     | -1.56 | Cardiac contraction                                                  | Q9JKF1 | Oregano/10 |
| Homeodomain-only protein                                     | HOPX     | < 0.0001 | -1.3  | Cardiac contraction                                                  | Q8R1H0 | Oregano/10 |
| Isoform 2 of Aspartyl/asparaginyl beta-hydroxylase           | ASPH     | < 0.0001 | -1.04 | Cardiac contraction                                                  | Q8BSY0 | Oregano/10 |

|                                                                                                            |        |       |       |                                                               |        |            |
|------------------------------------------------------------------------------------------------------------|--------|-------|-------|---------------------------------------------------------------|--------|------------|
| Isoform 2 of Tropomyosin alpha-3 chain                                                                     | TPM3   | 0.03  | -0.85 | Cardiac contraction                                           | P21107 | Oregano/10 |
| Actin-related protein 2                                                                                    | ACTR2  | 0.03  | -0.78 | Cardiac contraction                                           | P61161 | Oregano/10 |
| Myosin-1                                                                                                   | MYH1   | 0.01  | 1.44  | Cardiac contraction                                           | Q5SX40 | Oregano/10 |
| Dystrobrevin alpha                                                                                         | DTNA   | 0.04  | 1.33  | Cardiac contraction                                           | Q9D2N4 | Oregano/10 |
| Coiled-coil-helix-coiled-coil-helix domain-containing protein 2                                            | CHCHD2 | 0.01  | -1.87 | Oxidative stress response                                     | Q9D1L0 | Oregano/20 |
| Small ubiquitin-related modifier 3                                                                         | SUMO3  | 0.002 | -1.64 | SUMOylation, process regulated by cellular oxidative stress   | Q9Z172 | Oregano/20 |
| NADH-ubiquinone oxidoreductase chain 4                                                                     | MTND4  | 0.04  | -1.34 | Mitochondrial respiratory chain                               | P03911 | Oregano/20 |
| Protein-glutamine gamma-glutamyltransferase 2                                                              | TGM2   | 0.04  | -0.74 | Promote apoptosis under oxidative stress                      | P21981 | Oregano/20 |
| NADH dehydrogenase [ubiquinone] 1 beta subcomplex subunit 5, mitochondrial                                 | NDUFB5 | 0.02  | -0.67 | Mitochondrial respiratory chain                               | Q9CQH3 | Oregano/20 |
| Mitochondrial import inner membrane translocase subunit TIM16                                              | PAM16  | 0.04  | -0.6  | Reactive oxygen species (ROS) homeostasis                     | Q9CQV1 | Oregano/20 |
| Lipoamide acyltransferase component of branched-chain alpha-keto acid dehydrogenase complex, mitochondrial | DBT    | 0.04  | -0.51 | Inner-mitochondrial enzyme complex                            | P53395 | Oregano/20 |
| Fumarylacetoacetate hydrolase domain-containing protein 2A                                                 | FAHD2A | 0.03  | -0.51 | Hydrolase activity mitochondrial enzyme                       | Q3TC72 | Oregano/20 |
| Cytochrome b5 type B                                                                                       | CYB5B  | 0.01  | -0.51 | Nitric oxide biosynthesis and electron carrier for oxygenases | Q9CQX2 | Oregano/20 |
| Carbonic anhydrase 1                                                                                       | CA1    | 0.01  | 2.19  | Hydration of carbon dioxide                                   | P13634 | Oregano/20 |
| Hemoglobin subunit beta-2                                                                                  | HBB-B2 | 0.02  | 1.85  | Oxygen transport                                              | P02089 | Oregano/20 |
| Bisphosphoglycerate mutase                                                                                 | BPGM   | 0.01  | 1.78  | Hemoglobin oxygen affinity regulation                         | P15327 | Oregano/20 |

|                                                 |        |       |       |                                                                          |        |            |
|-------------------------------------------------|--------|-------|-------|--------------------------------------------------------------------------|--------|------------|
| Thiosulfate sulfurtransferase                   | TST    | 0.004 | 1.66  | Sulfur metabolism and detoxification and anti-oxidative stress functions | P52196 | Oregano/20 |
| Hemoglobin subunit beta-1                       | HBB-B1 | 0.006 | 1.6   | Oxygen transport                                                         | P02088 | Oregano/20 |
| Hemoglobin subunit alpha                        | HBA    | 0.04  | 1.34  | Oxygen transport                                                         | P01942 | Oregano/20 |
| Carbonic anhydrase 3                            | CA3    | 0.009 | 1.31  | Hydration of carbon dioxide                                              | P16015 | Oregano/20 |
| Hemopexin                                       | HPX    | 0.01  | 1.09  | Heme transport and oxidative stress protection                           | Q91X72 | Oregano/20 |
| Clusterin                                       | CLU    | 0.007 | 0.82  | Oxidative stress-induced cell death regulation                           | Q06890 | Oregano/20 |
| Dehydrogenase/reductase SDR family member 11    | DHRS11 | 0.05  | 0.79  | Reduce alpha-dicarbonyl compounds                                        | Q3U0B3 | Oregano/20 |
| obg-like ATPase 1                               | OLA1   | 0.01  | 0.76  | Oxidative stress response                                                | Q9CZ30 | Oregano/20 |
| Glutathione peroxidase 1                        | GPX1   | 0.01  | 0.68  | Hydrogen peroxide degradation                                            | P11352 | Oregano/20 |
| Serotransferrin                                 | TF     | 0.003 | 0.63  | Iron metabolism                                                          | Q921I1 | Oregano/20 |
| Catalase                                        | CAT    | 0.03  | 0.56  | Hydrogen peroxide degradation                                            | P24270 | Oregano/20 |
| Ras-related protein Rab-5C                      | RAB5C  | 0.01  | 0.54  | Oxidative stress response                                                | P35278 | Oregano/20 |
| Trans-1,2-dihydrobenzene-1,2-diol dehydrogenase | DHDH   | 0.003 | 0.5   | NADP1-linked oxidation of transdihydrodiols of aromatic hydrocarbons     | Q9DBB8 | Oregano/20 |
| Isoform 5 of LIM domain-binding protein 3       | LDB3   | 0.009 | -0.95 | Cardiac contraction                                                      | Q9JKS4 | Oregano/20 |
| Tropomyosin alpha-4 chain                       | TPM4   | 0.005 | 1.3   | Cardiac contraction                                                      | Q6IRU2 | Oregano/20 |
| Calsequestrin-2                                 | CASQ2  | 0.04  | 0.99  | Cardiac contraction                                                      | O09161 | Oregano/20 |

GeneCards database (<http://www.genecards.org/>) was used to identify the biological function of the proteins.
